# Supplementary material
Source: ML conference proceedings conference paper supplement (https://proceedings.neurips.cc/paper_files/paper/2011/hash/0c048b3a434e49e655c1247efb389cec-Abstract.html)
Supplement: Supplementary file 1 [file 0c048b3a434e49e655c1247efb389cec-Supplemental.zip]

## Appendix

### Derivation of Laplace Approximation

We approximated the posterior as a Gaussian distribution by the Laplace approximation, i.e.,  $p(\mathbf{f}|\mathbf{r}, \theta)|_{\mathbf{f}=\mathbf{f}_{\text{map}}} \approx \mathcal{N}(\mathbf{f}|\mathbf{f}_{\text{map}}, \Lambda)$ . Here,  $\mathbf{f}_{\text{map}}$  is the maximum of the log-posterior in eq.(5) and  $\Lambda$  is defined by

$$\begin{aligned}\Lambda^{-1} &= -\frac{\partial^2}{\partial \mathbf{f}^2} \log p(\mathbf{f}|\mathbf{r}, \theta)|_{\mathbf{f}=\mathbf{f}_{\text{map}}} \\ &= -\frac{\partial^2}{\partial \mathbf{f}^2} [\mathbf{r}^\top \log(g(\mathbf{f})) - \mathbf{1}^\top g(\mathbf{f}) - \frac{1}{2}(\mathbf{f} - \boldsymbol{\mu}_{\mathbf{f}})^\top K^{-1}(\mathbf{f} - \boldsymbol{\mu}_{\mathbf{f}})]|_{\mathbf{f}=\mathbf{f}_{\text{map}}} \\ &= \text{diag} \left\{ \mathbf{r} ./ (g(\mathbf{f}) \circ g(\mathbf{f})) \circ \left( \frac{\partial g(\mathbf{f})}{\partial \mathbf{f}} \right)^2 - [\mathbf{r} ./ g(\mathbf{f}) - \mathbf{1}] \circ \left( \frac{\partial^2 g(\mathbf{f})}{\partial \mathbf{f}^2} \right) \right\} |_{\mathbf{f}=\mathbf{f}_{\text{map}}} + K^{-1}\end{aligned}$$

where  $\circ$  and  $./$  are Hadamard multiplication and division respectively.

### When $K$ is ill-conditioned

We find the SVD of  $K$  to select the eigenvectors corresponding to eigenvalues that are greater than some threshold. Assume each column of an orthogonal matrix  $B$  is the eigenvectors we will keep, and project  $\mathbf{f}$ ,  $K$ ,  $\boldsymbol{\mu}_{\mathbf{f}}$  onto the lower dimensional space by  $\mathbf{w} = B^T \mathbf{f}$ ,  $K_p = B^T K B$ ,  $\boldsymbol{\mu}_{\mathbf{f}_p} = B^T \boldsymbol{\mu}_{\mathbf{f}}$ .

The log-posterior in the lower dimensional space is given by:

$$\log p(\mathbf{w}|\mathbf{r}, \theta) = \mathbf{r}^T \log(g(B\mathbf{w})) - \mathbf{1}^T g(B\mathbf{w}) - \frac{1}{2}(\mathbf{w} - \boldsymbol{\mu}_{\mathbf{f}_p})^T K_p^{-1}(\mathbf{w} - \boldsymbol{\mu}_{\mathbf{f}_p}) + \text{const} \quad (1)$$

$\mathbf{w}_{\text{map}}$  is the maximum of eq.(2). Assuming  $g(x) = \log(1 + \exp(x))$ ,  $\Lambda_{\mathbf{w}}$  in the lower dimensional space is given by

$$\begin{aligned}\Lambda_{\mathbf{w}}^{-1} &= -\frac{\partial^2 \log p(\mathbf{w}|\mathbf{r}, \theta)}{\partial \mathbf{w}^2} |_{\mathbf{w}=\mathbf{w}_{\text{map}}} \\ &= B^T \text{diag}(z) B + K_p^{-1}\end{aligned} \quad (2)$$

where  $z = \left[ r \circ \left( g(B\mathbf{w}) \frac{\partial^2 g}{\partial \mathbf{w}^2} - \left( \frac{\partial g}{\partial \mathbf{w}} \right)^2 \right) - g^2(B\mathbf{w}) \circ \frac{\partial^2 g}{\partial \mathbf{w}^2} \right] ./ (g(B\mathbf{w}) \circ g(B\mathbf{w})) |_{\mathbf{w}=\mathbf{w}_{\text{map}}}$
